# Supplementary material for: The transcriptional repressor HDAC7 promotes apoptosis and c-Myc downregulation in particular types of leukemia and lymphoma
Source: PubMed Central journal article supplement (PMC4669785; doi:10.1038/cddis.2014.594), 2015-02-12
Supplement: cddis2014594x8.pdf [file cddis2014594x8.pdf]

**Supplementary Table S2. HDAC7 repressed genes belonging to immune processes and cancer categories.**

| Log2FC | pValue   | Gene Symbol | Apoptosis | Immune System | Cancer | Nature                                                    |
|--------|----------|-------------|-----------|---------------|--------|-----------------------------------------------------------|
| -1,5   | 3,41E-05 | TNFRSF19    |           |               | *      | TNF-receptor superfamily                                  |
| -1,5   | 8,84E-07 | IGFBP3      |           |               | *      | insulin-like growth factor binding protein (IGFBP) family |
| -1,5   | 7,42E-05 | ARHGAP18    |           |               | *      | Rho GTPase-activating protein                             |
| -1,4   | 4,12E-03 | AICDA       |           | *             | *      | RNA-editing deaminase                                     |
| -1,2   | 1,90E-04 | VAV3        |           |               | *      | Guanine nucleotide exchange factor for RHO GTPASES        |
| -1,1   | 4,04E-04 | ZFAT        |           | *             |        | Transcription factor                                      |
| -1,1   | 2,71E-05 | CERKL       | *         |               |        | Ceramide kinase-like protein                              |
| -1,1   | 4,30E-05 | TERT        |           |               | *      | Telomerase                                                |
| -1,0   | 1,66E-04 | ITGA4       |           | *             | *      | Integrin alpha subunit                                    |
| -1,0   | 1,23E-03 | MYC         |           |               | *      | Multifunctional nuclear phosphoprotein                    |
| -0,9   | 2,50E-03 | GNG7        |           |               | *      | Guanine nucleotide-binding protein $\gamma$ -7            |
| -0,9   | 2,47E-04 | IRF4        |           | *             | *      | Lymphoid-specific interferon regulatory factor            |
| -0,9   | 5,16E-04 | CTSC        |           | *             |        | A papain-like cysteine protease                           |
| -0,8   | 7,52E-05 | DHX33       |           |               | *      | DEAD box protein                                          |
| -0,7   | 4,48E-04 | MTDH        |           |               | *      | Cell adhesion mollecule                                   |
| -0,7   | 1,52E-03 | MYBBP1A     |           |               | *      | Nucleo-cytoplasmic transporter protein                    |
| -0,7   | 1,39E-03 | EEF1E1      |           |               | *      | Peptide elongation factor                                 |
| -0,7   | 5,46E-04 | PNO1        |           | *             |        | Rna binding protein                                       |
| -0,7   | 1,12E-03 | MGLL        |           |               | *      | Serine hydrolase of the AB hydrolase superfamily          |
| -0,6   | 2,30E-03 | TNFRSF13B   |           | *             |        | TNF-receptor superfamily member                           |
| -0,5   | 2,47E-03 | TPD52       |           |               | *      | Neoplasm protein                                          |
